# Supplementary material for: Rapid, efficient and controllable photo-assisted polysulfide sealing over MnO2
Source: Royal Society of Chemistry journal article supplement (doi:10.1039/d3nj00626c), 2023-01-01
Supplement: d3nj00626c1.pdf [file d3nj00626c1.pdf]

# Supporting Information

## Rapid, Efficient and Controllable Photo-assisted Polysulfide Sealing Over MnO<sub>2</sub>

Qianxing Gao<sup>a</sup>, Jia-qi Bai<sup>\*a</sup>, Yinghong Song<sup>b</sup>, Mingyuan Wu<sup>a</sup>, Lei Huang<sup>a</sup>, Jingshuai Chen<sup>a</sup>, Songhua Wu<sup>b</sup>, Song Sun<sup>\*a</sup>

<sup>a</sup> School of Chemistry and Chemical Engineering, Anhui University, Hefei 230601, Anhui, People's Republic of China

<sup>b</sup> AECC Beijing Institute of Aeronautical Materials, Beijing 100095, People's Republic of China

\*. Corresponding authors.

E-mail addresses: jiaqibai@ahu.edu.cn (J. -q. Bai), suns@ustc.edu.cn (S. Sun)

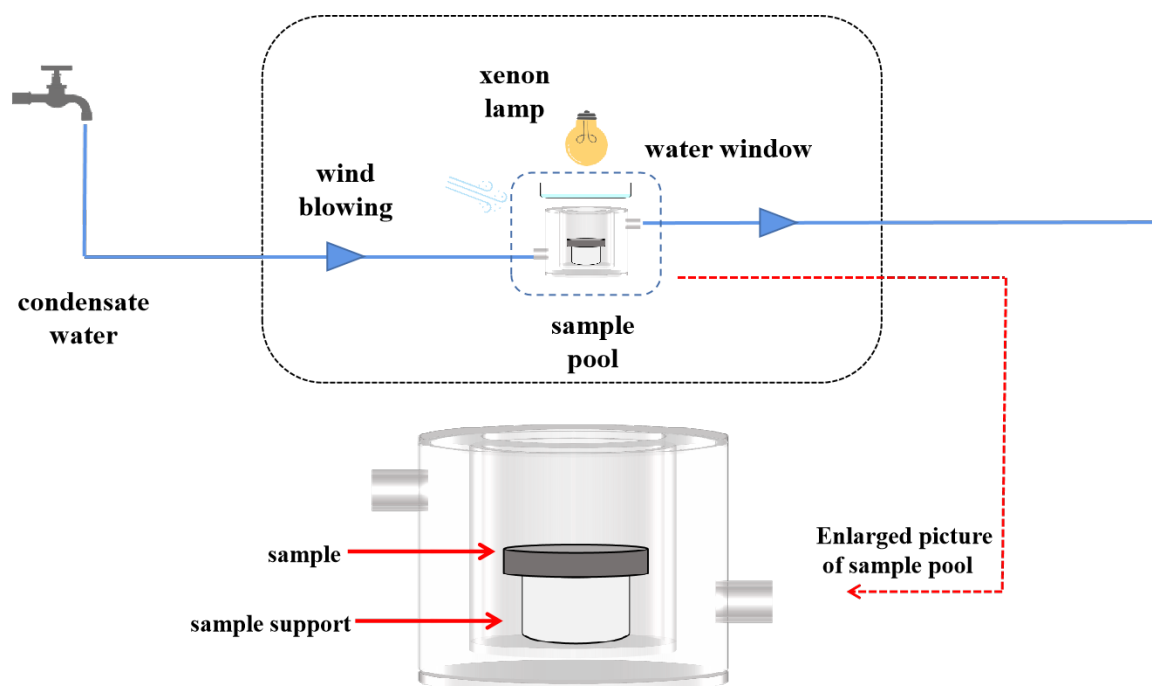

**Figure S1.** Diagram of glass reactor for photo-assisted polysulfide curing.

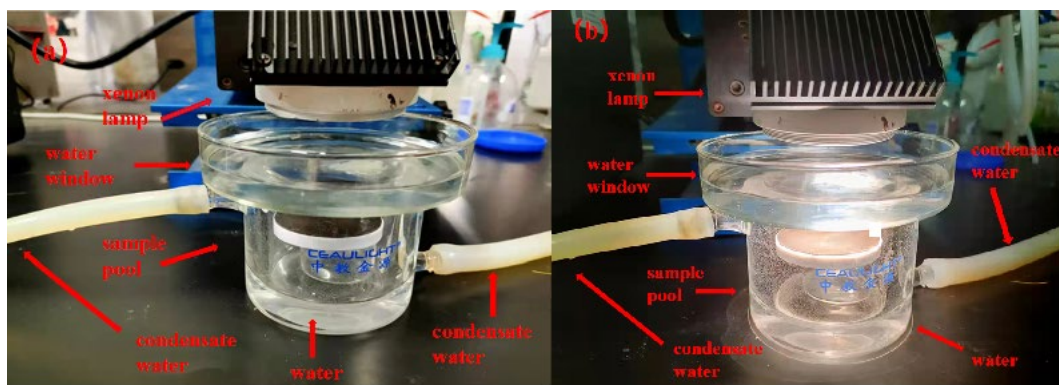

**Figure S2.** The photo-assisted polysulfide curing device physical drawing of the glass reactor with water window. (a) turning off light, (b) turning on light.

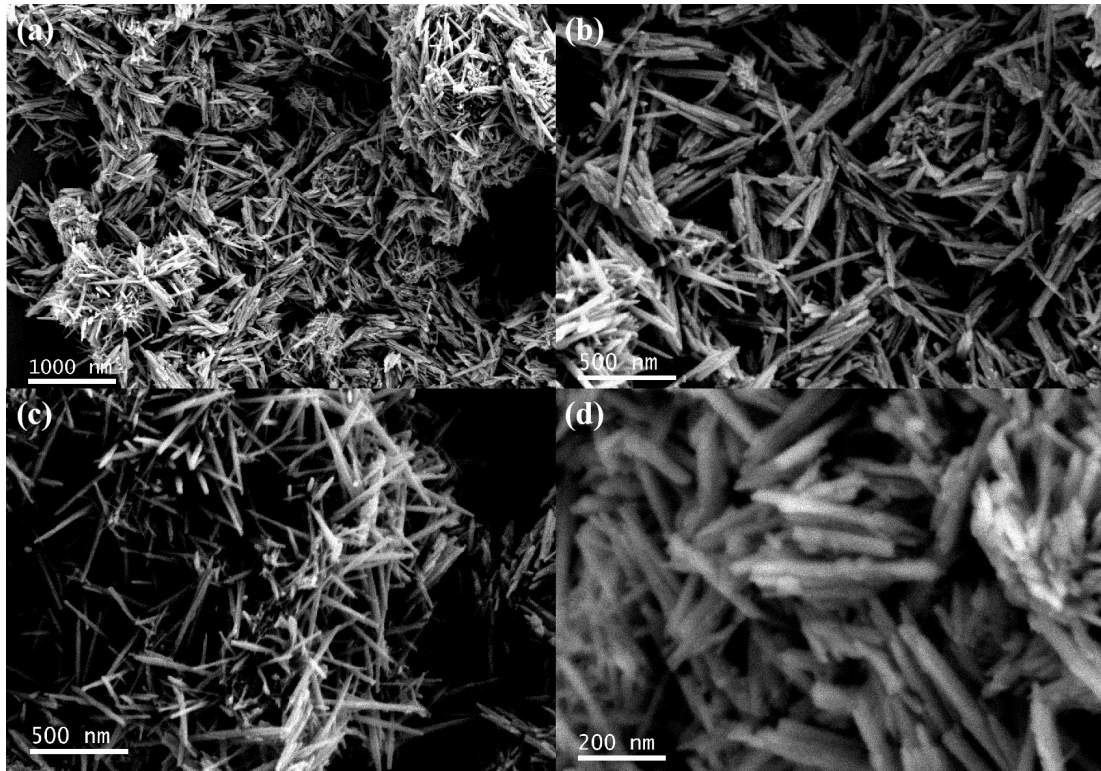

**Figure S3.** SEM images of  $\alpha$ - $\text{MnO}_2$  at different resolutions (a) 1000 nm, (b) 500 nm, (c) 500 nm, (d) 200 nm.

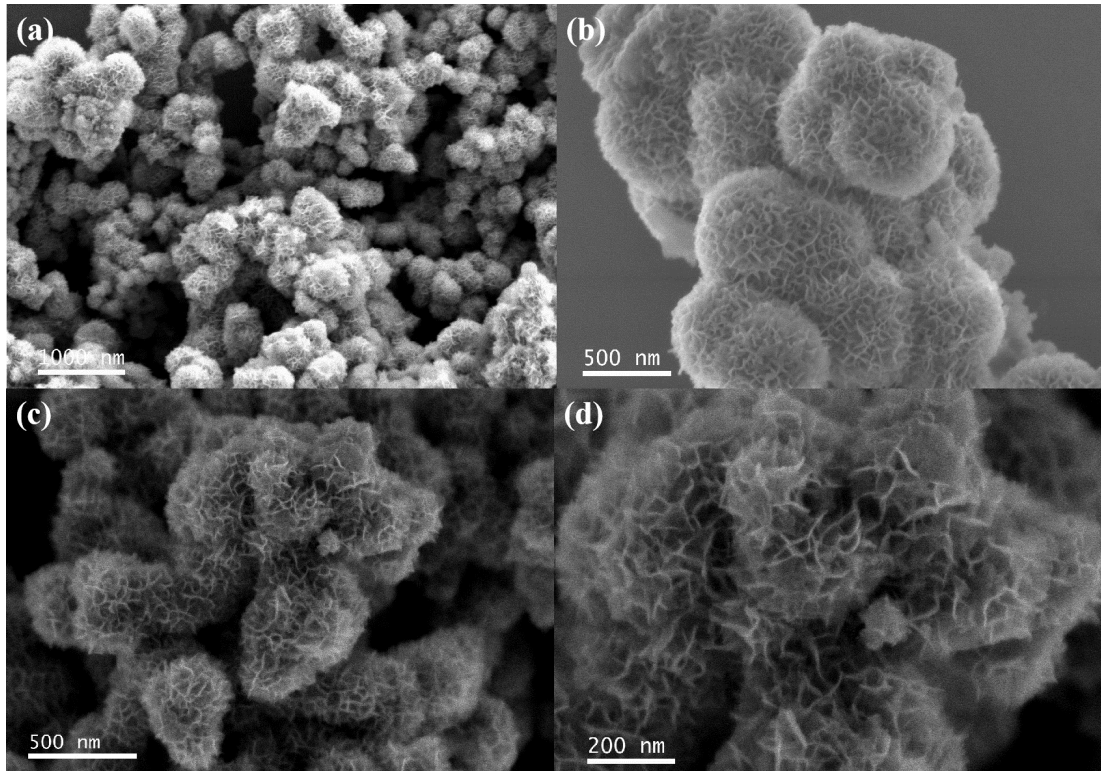

**Figure S4.** SEM images of  $\delta$ -MnO<sub>2</sub> at different resolutions (a) 1000 nm, (b) 500 nm, (c) 500 nm, (d) 200 nm.

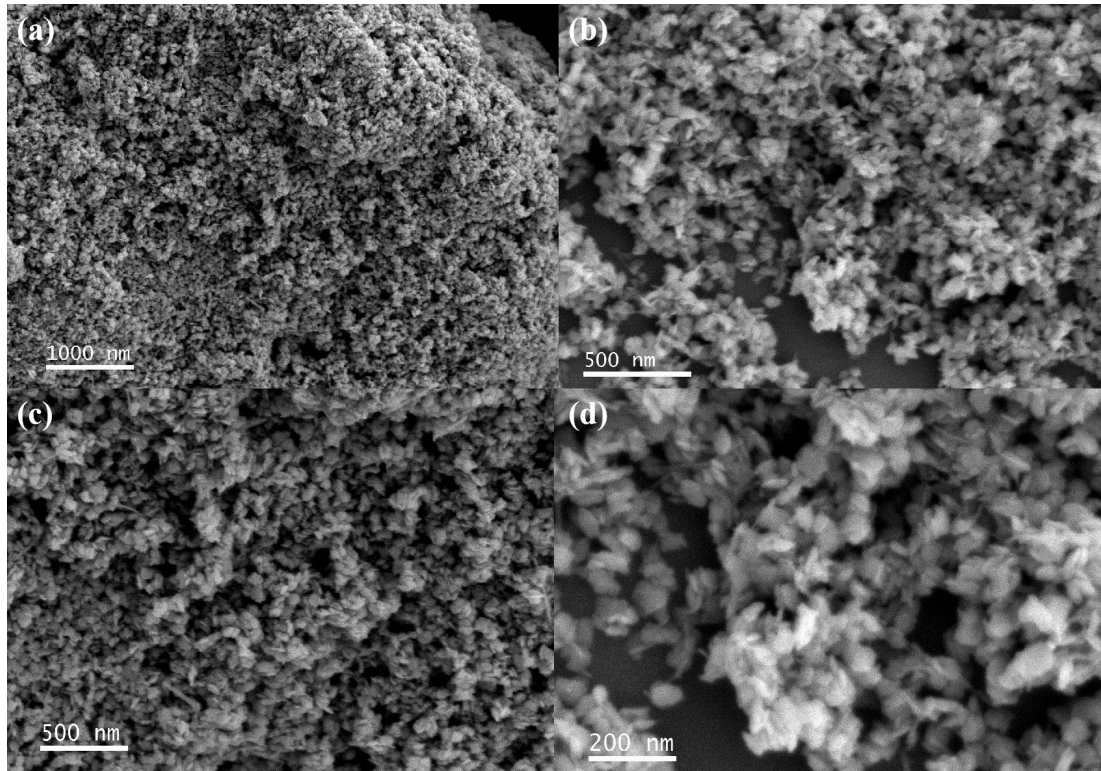

**Figure S5.** SEM images of  $\gamma$ -MnO<sub>2</sub> at different resolutions (a) 1000 nm, (b) 500 nm, (c) 500 nm, (d) 200 nm.

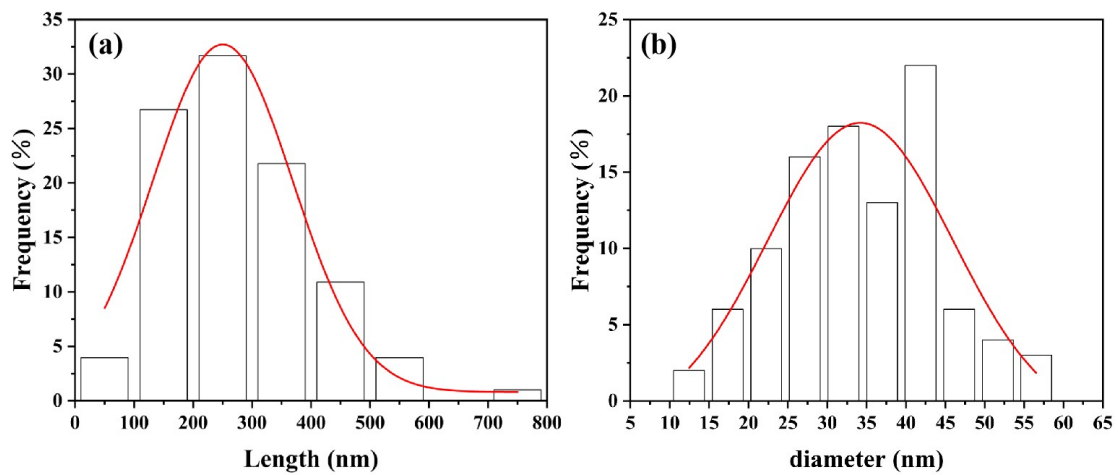

**Figure S6.** The length distribution (a) and diameter distribution (b) of  $\alpha$ -MnO<sub>2</sub>.

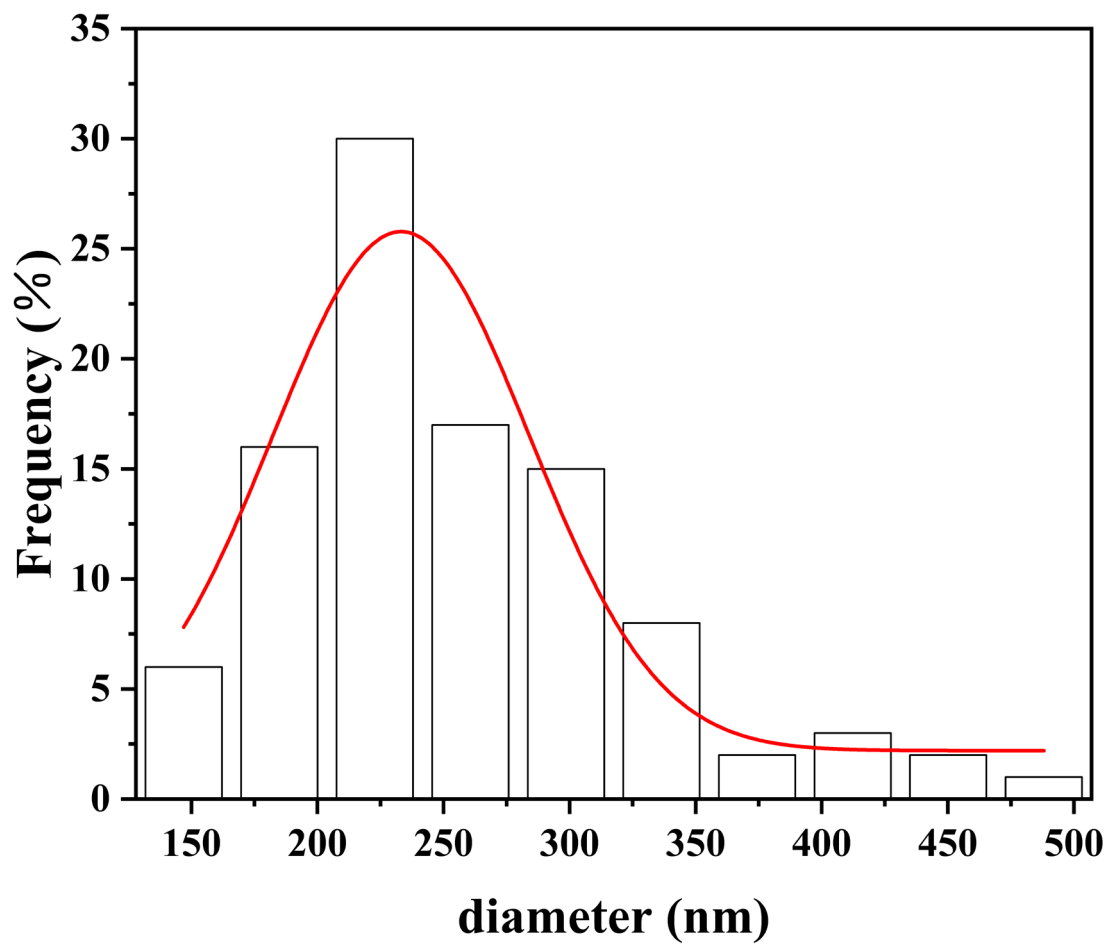

Figure S7. The diameter distribution of  $\delta$ -MnO<sub>2</sub>.



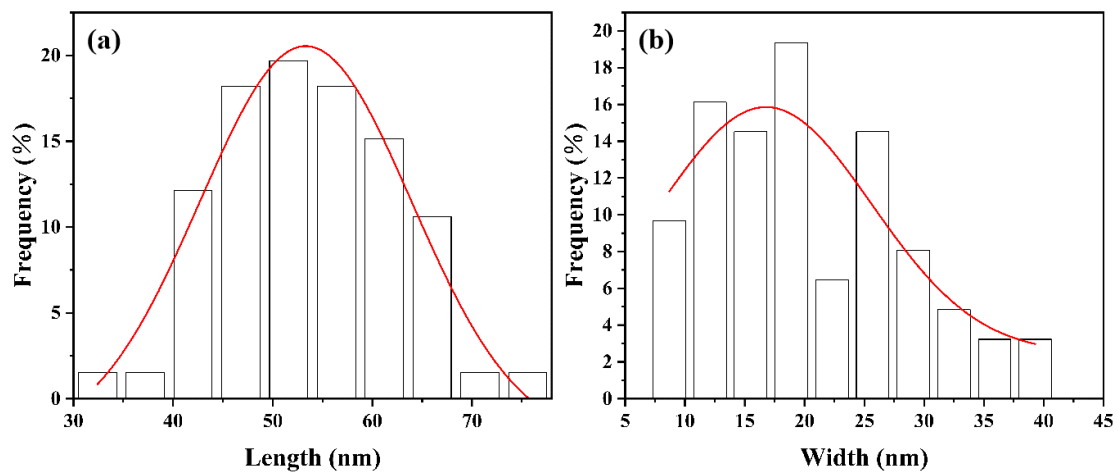

**Figure S8.** The length distribution (a) and width distribution (b) of  $\gamma$ -MnO<sub>2</sub>.

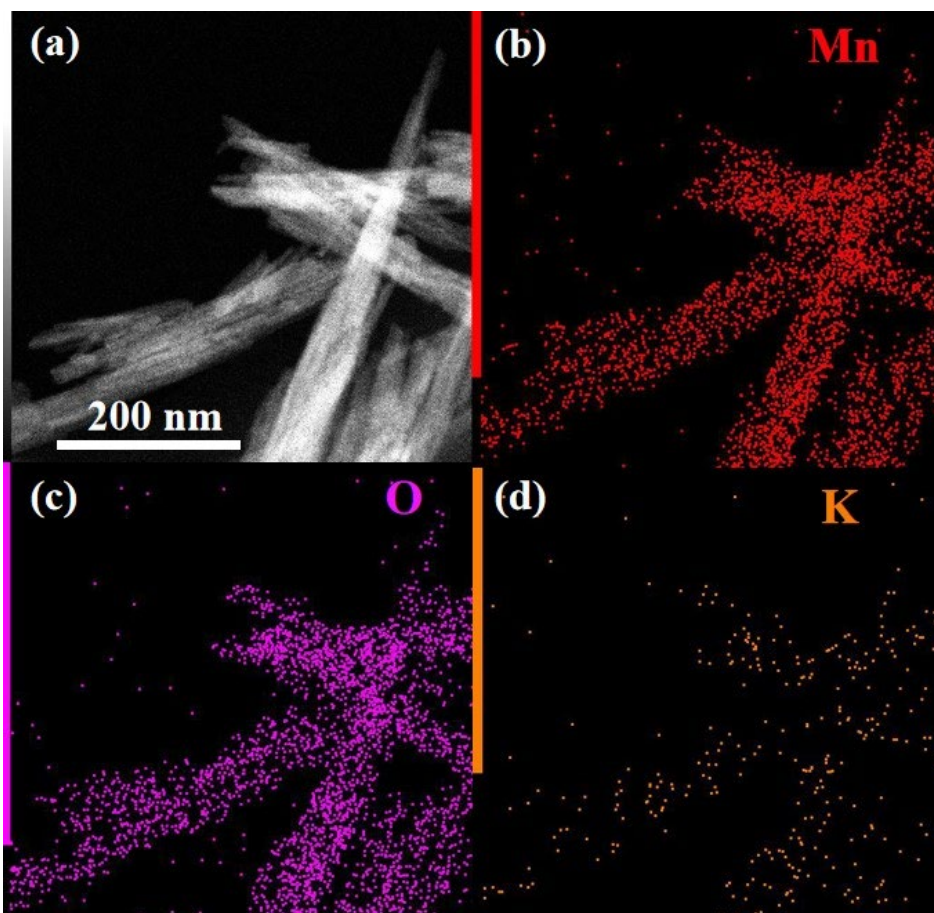

**Figure S9.** TEM images of  $\alpha$ - $\text{MnO}_2$  with a scale bar of 200 nm (a), EDX mapping of  $\alpha$ - $\text{MnO}_2$ , Mn (b), O (c), and K (d).

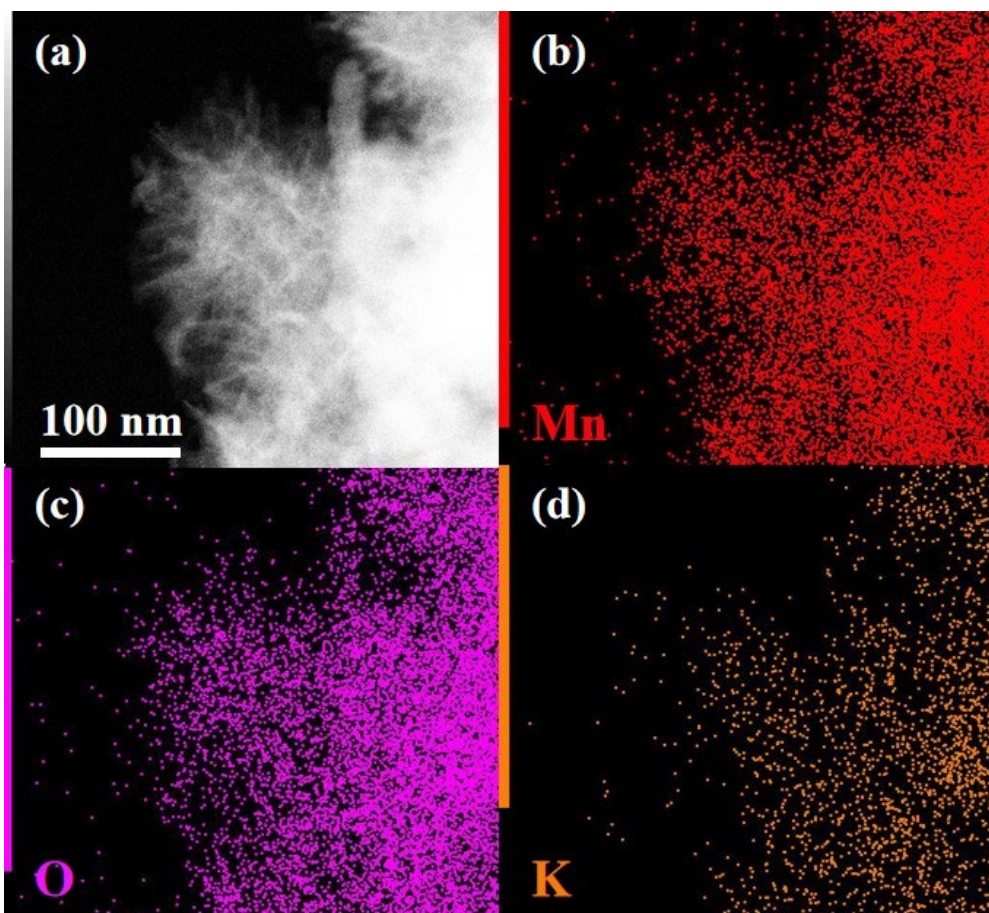

**Figure S10.** TEM images of  $\delta$ -MnO<sub>2</sub> with a scale bar of 100 nm (a) and EDX mapping of  $\delta$ -MnO<sub>2</sub>, Mn (b), O (c), and K (d).

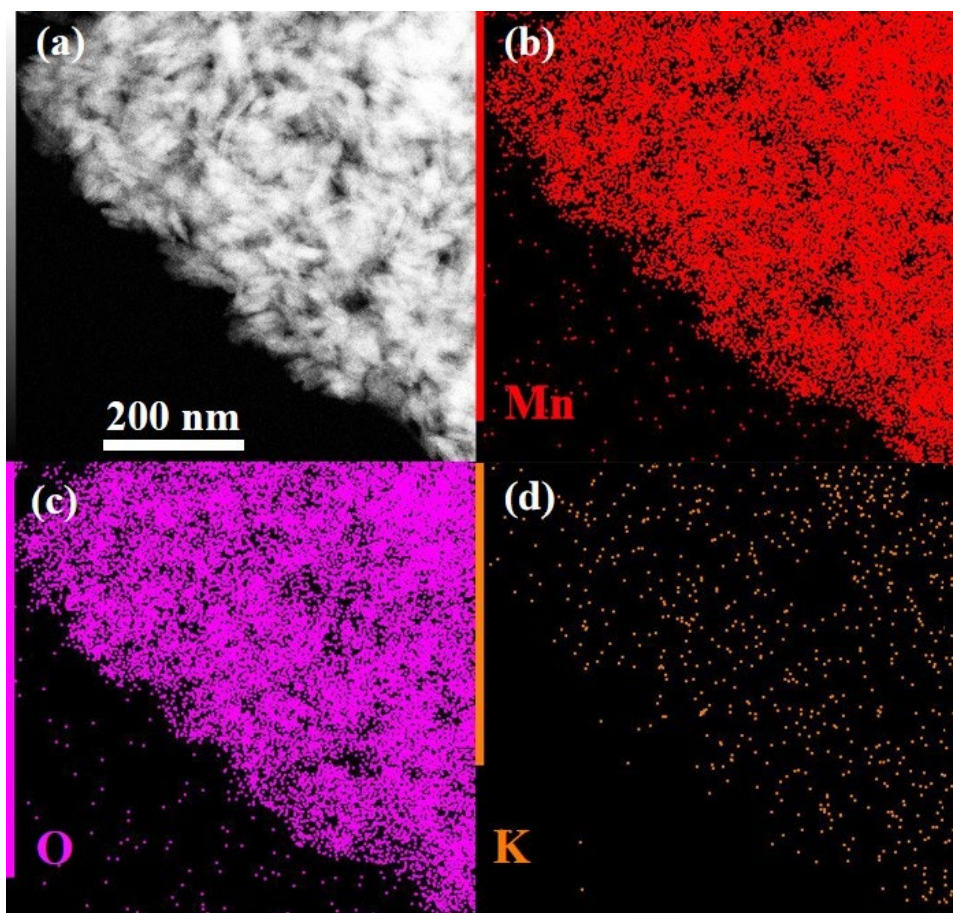

**Figure S11.** TEM images of  $\gamma$ -MnO<sub>2</sub> with a scale bar of 200 nm (a) and EDX mapping of  $\gamma$ -MnO<sub>2</sub>, Mn (b), O (c), and K (d).

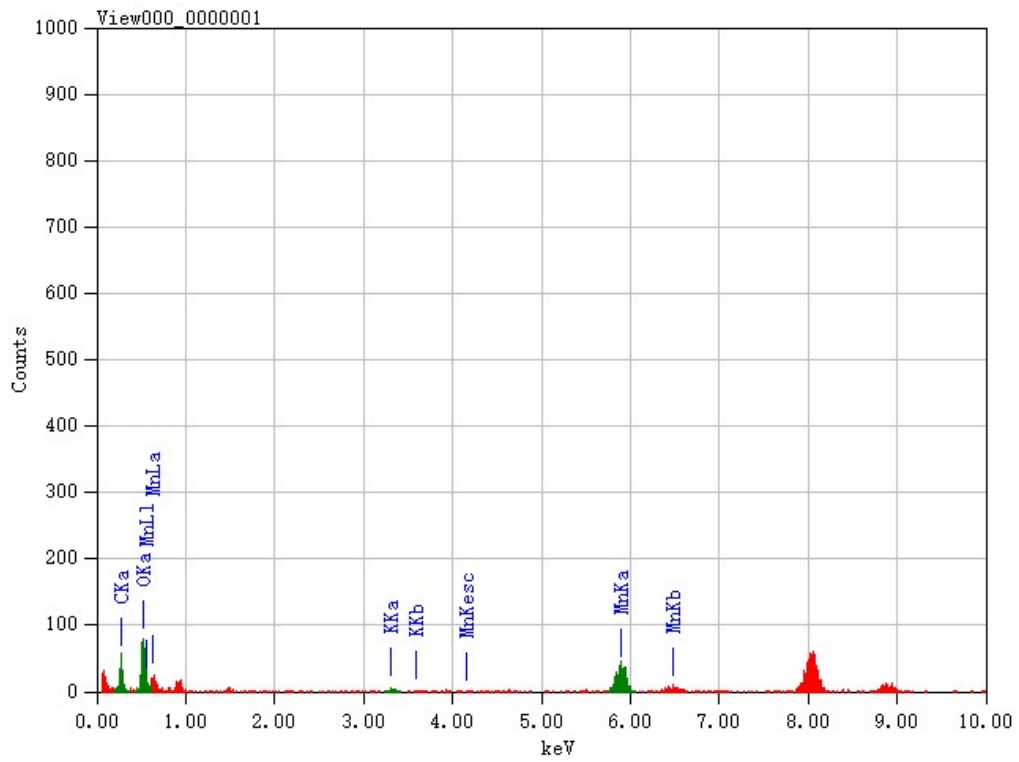

**Figure S12.** EDS spectra of  $\alpha$ -MnO<sub>2</sub>.

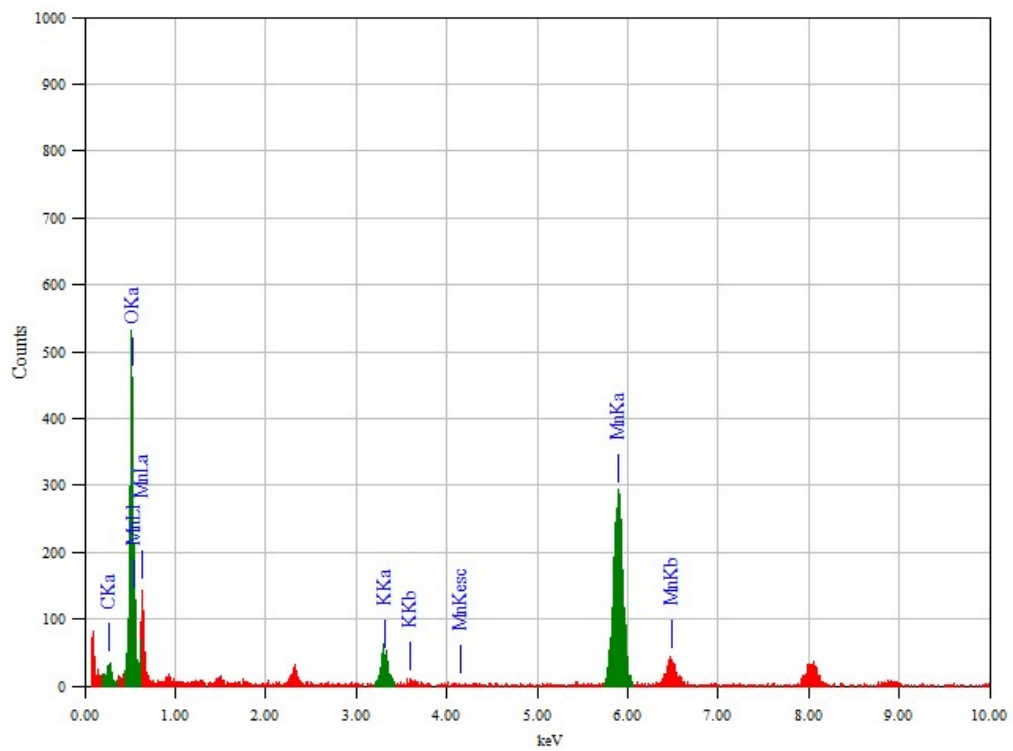

Figure S13. EDS spectra of  $\delta$ -MnO<sub>2</sub>.

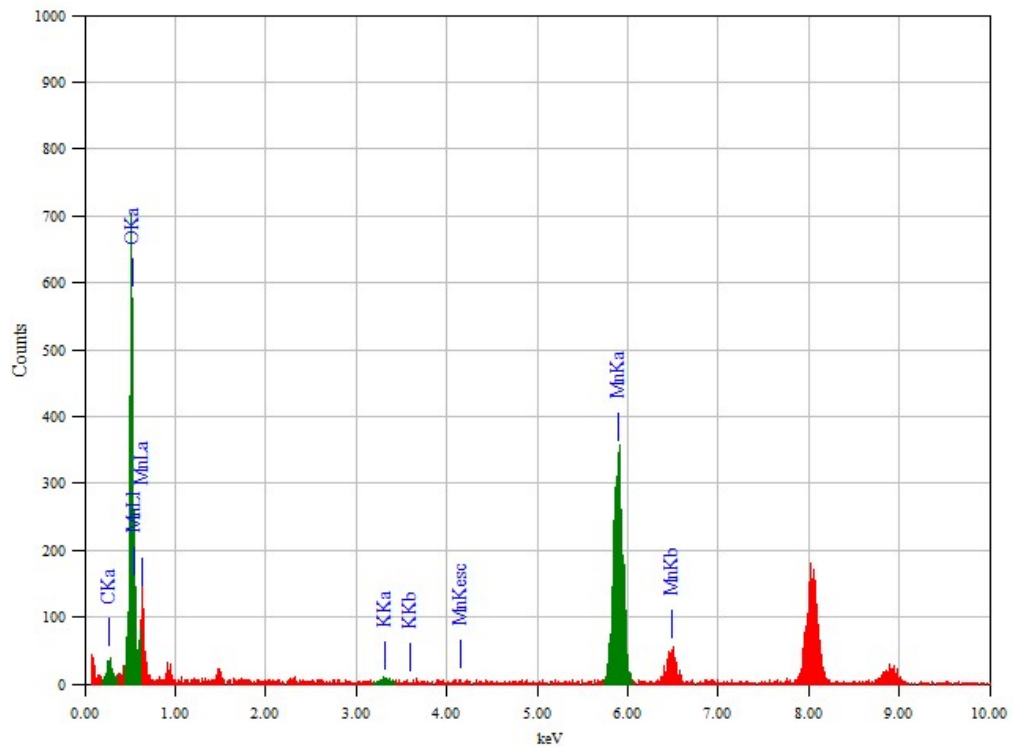

Figure S14. EDS spectra of  $\gamma$ -MnO<sub>2</sub>.

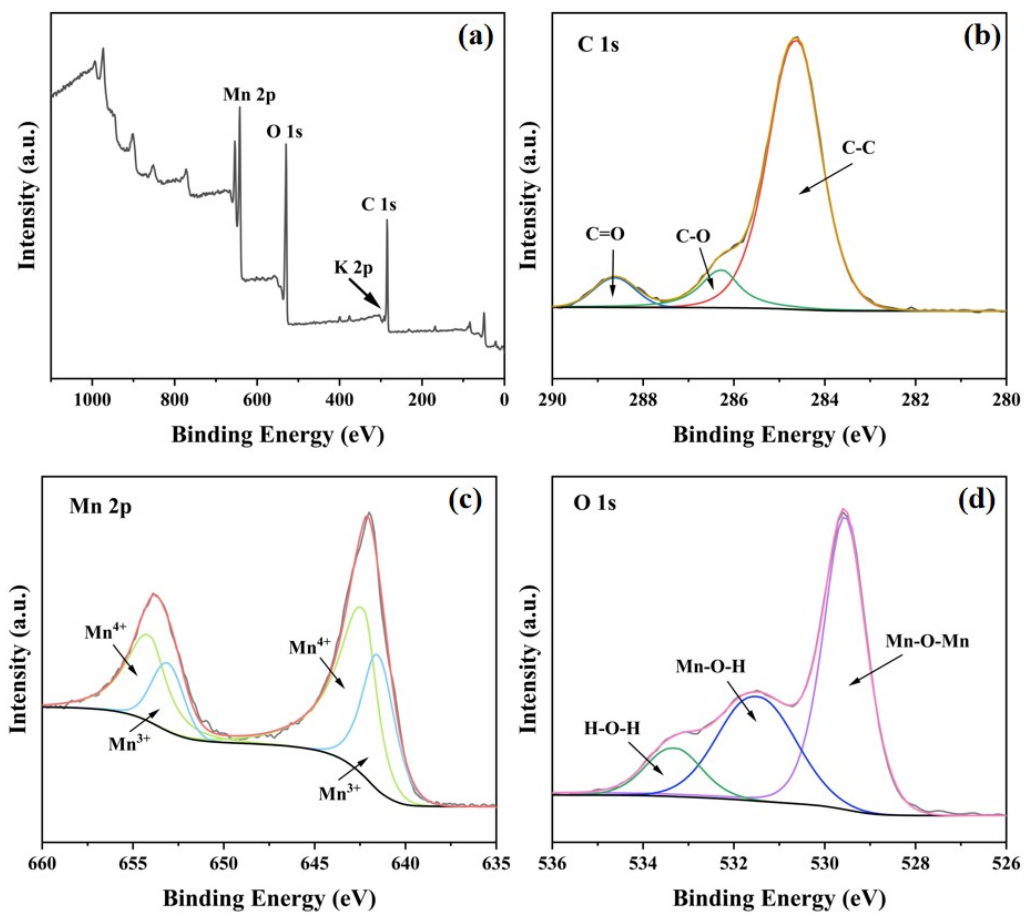

**Figure S15.** XPS survey spectrum (a) spectrum of C 1s (b) Mn 2p (c) and O 1s (d) for  $\alpha$ - $\text{MnO}_2$ .



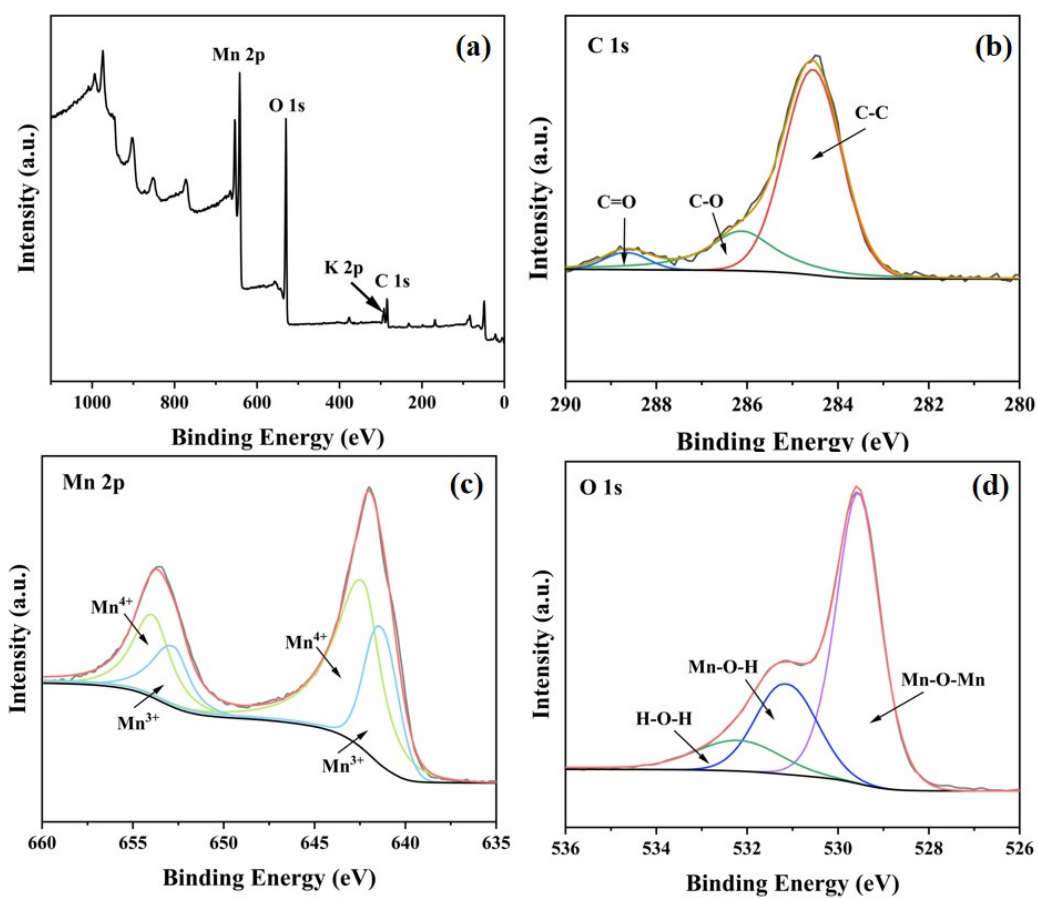

Figure S16. XPS survey spectrum (a) spectrum of C 1s (b) Mn 2p (c) and O 1s (d) for  $\delta$ -MnO<sub>2</sub>.

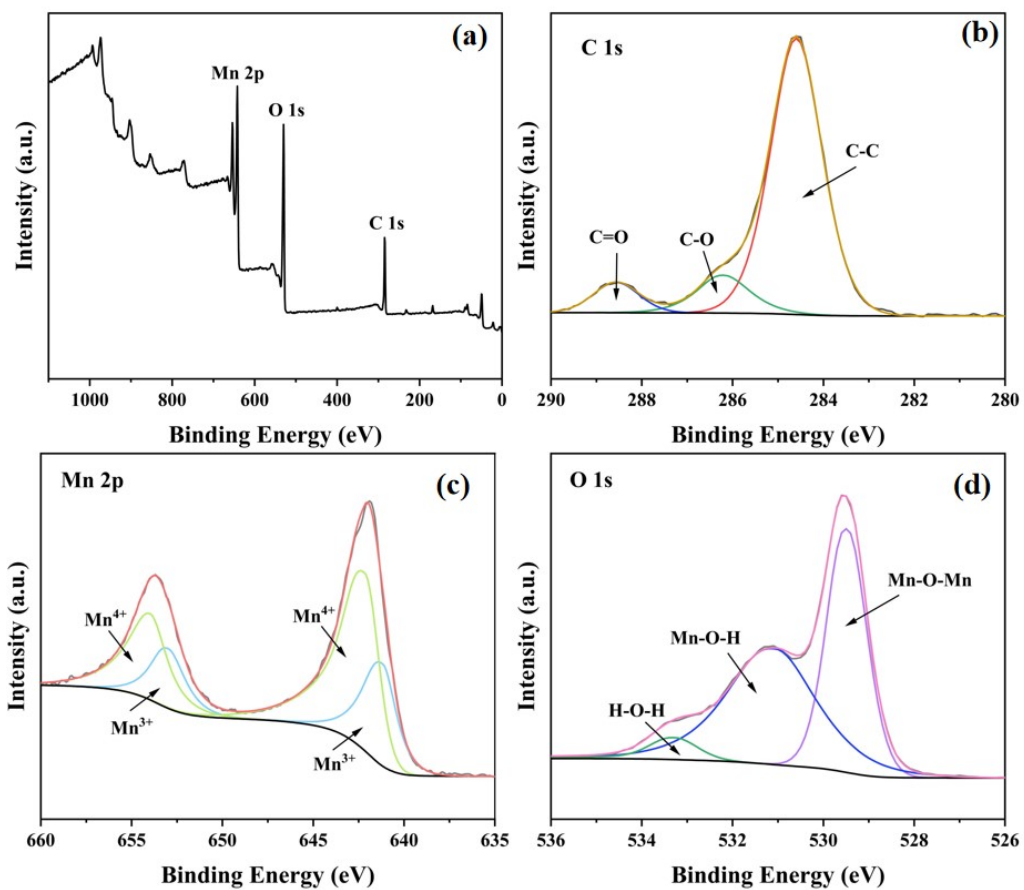

**Figure S17.** XPS survey spectrum (a) spectrum of C 1s (b) Mn 2p (c) and O 1s (d) for  $\gamma$ -MnO<sub>2</sub>.

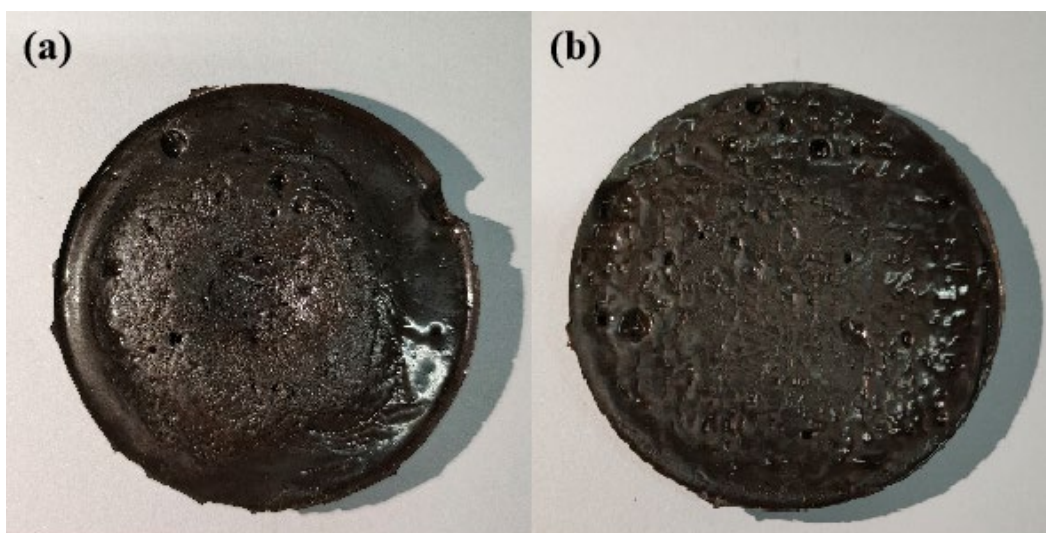

**Figure S18.** The polysulfide sealant photos over  $\delta\text{-MnO}_2$  under different conditions: (a) the position of rubber was fixed, (b) the rubber was uniformly shaken.

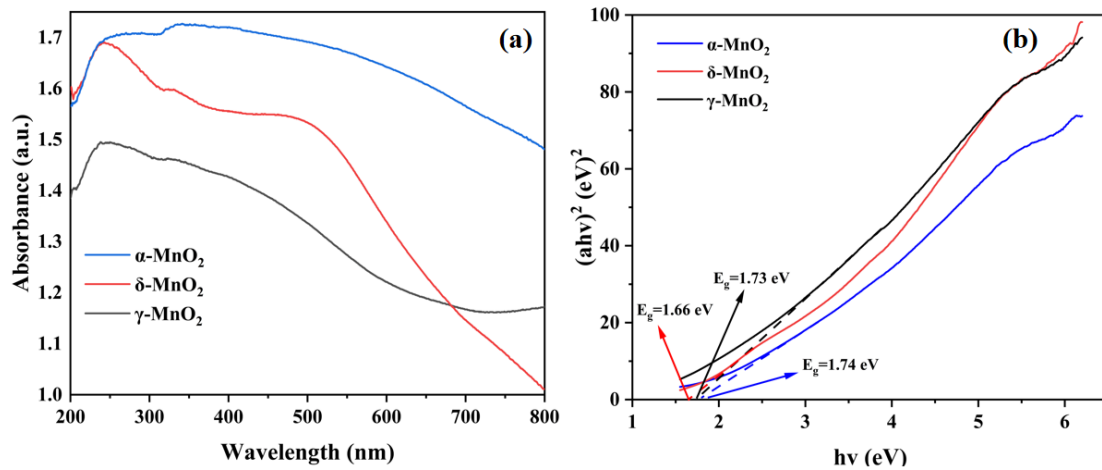

**Figure S19.** UV-Visible diffuse reflectance spectra of MnO<sub>2</sub> (a), and Tauc's plot for MnO<sub>2</sub> (b).

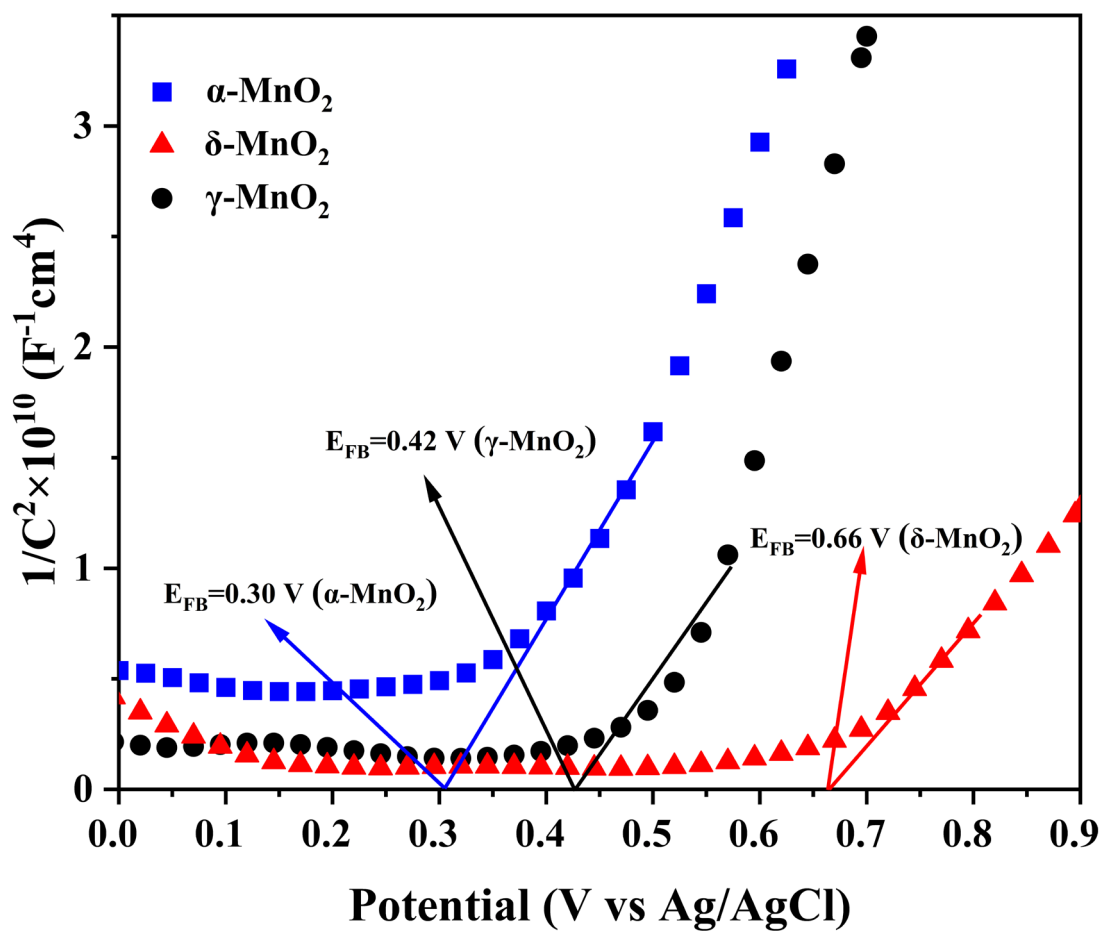

Figure S20. Mott-Schottky plot of MnO<sub>2</sub> in 0.5 M Na<sub>2</sub>SO<sub>4</sub> solution at 1000 Hz.

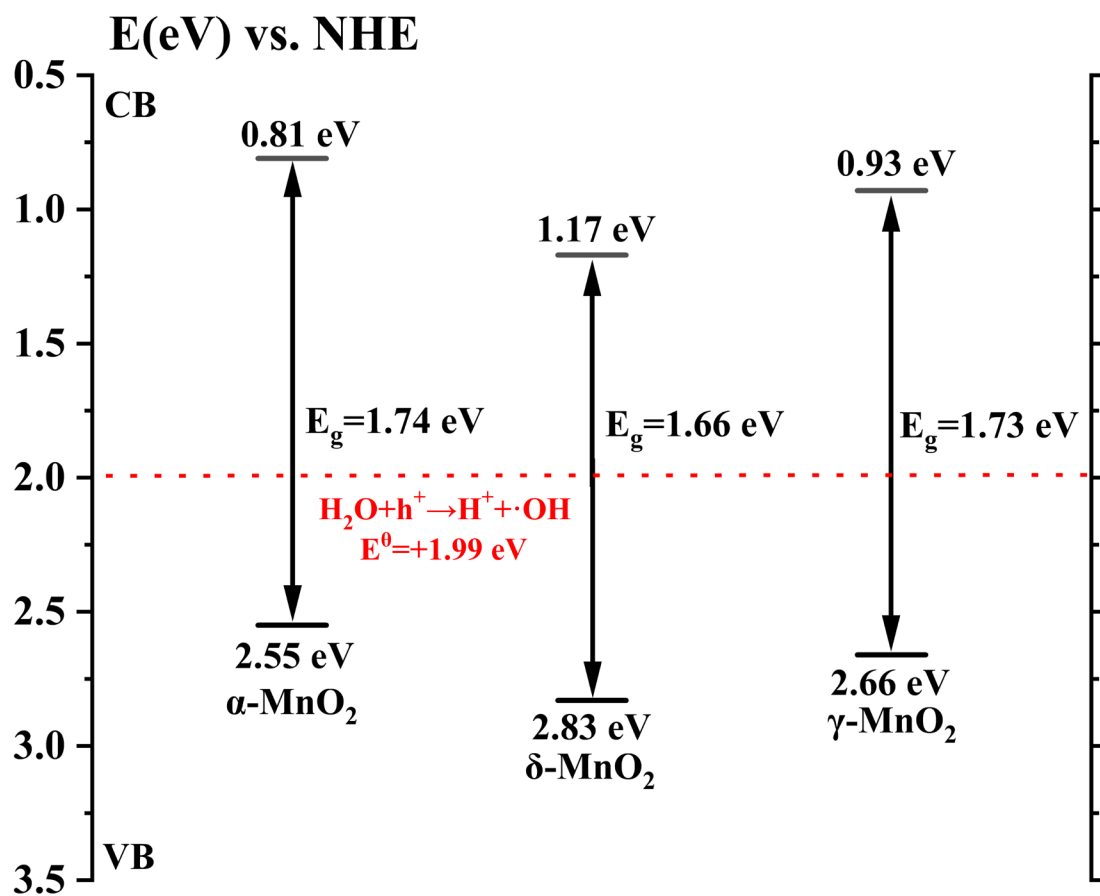

Figure S21. Diagram of energy band structure.

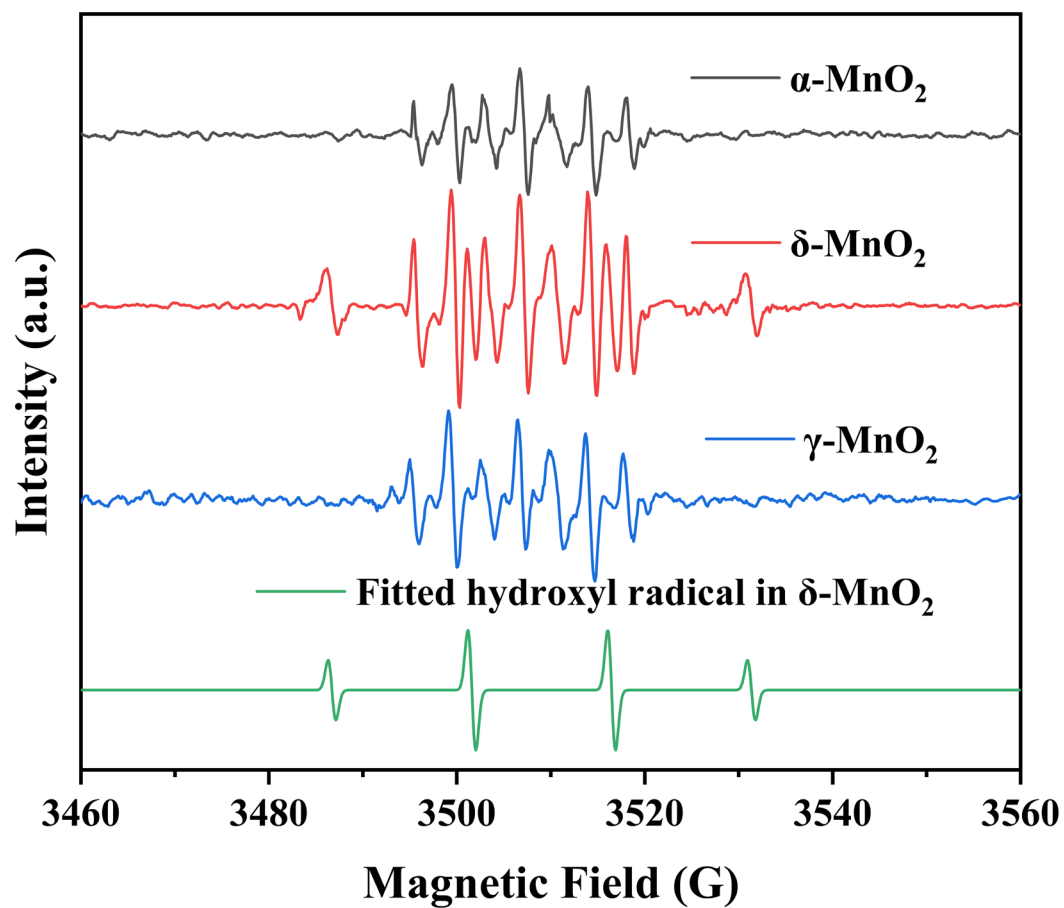

**Figure S22.** ESR spectra of  $\alpha$ -MnO<sub>2</sub>,  $\delta$ -MnO<sub>2</sub>,  $\gamma$ -MnO<sub>2</sub> and fitted hydroxyl radical in  $\delta$ -MnO<sub>2</sub>.

**Table S1.** Content of Mn and O elements in  $\alpha$ -MnO<sub>2</sub>,  $\delta$ -MnO<sub>2</sub>,  $\gamma$ -MnO<sub>2</sub>.

|                    | $\alpha$ -MnO <sub>2</sub> | $\delta$ -MnO <sub>2</sub> | $\gamma$ -MnO <sub>2</sub> |
|--------------------|----------------------------|----------------------------|----------------------------|
| <b>Mass % (Mn)</b> | 33.27                      | 54.72                      | 55.80                      |
| <b>Mass % (O)</b>  | 28.71                      | 36.76                      | 40.19                      |
| <b>Atom % (Mn)</b> | 11.07                      | 26.91                      | 26.46                      |
| <b>Atom % (O)</b>  | 32.79                      | 62.09                      | 65.42                      |
| <b>Mass % (K)</b>  | 1.62                       | 5.23                       | 0.39                       |
| <b>Atom % (K)</b>  | 0.76                       | 3.62                       | 0.26                       |
| <b>Mass % (C)</b>  | 36.40                      | 3.28                       | 3.63                       |
| <b>Atom % (C)</b>  | 55.38                      | 7.38                       | 7.86                       |
| <b>O/Mn</b>        | 2.96                       | 2.31                       | 2.47                       |



**Table S2.** Summary of the results of the XPS analysis.

|                              | $\alpha$ -MnO <sub>2</sub> | $\delta$ -MnO <sub>2</sub> | $\gamma$ -MnO <sub>2</sub> |
|------------------------------|----------------------------|----------------------------|----------------------------|
| <b>K %</b>                   | 0.29                       | 1.37                       | 0                          |
| <b>C %</b>                   | 33.7                       | 9.44                       | 25.92                      |
| <b>Mn %</b>                  | 8.40                       | 14.79                      | 10.28                      |
| <b>O %</b>                   | 25.88                      | 32.23                      | 28.41                      |
| <b>K/ Mn %</b>               | 0.035                      | 0.093                      | 0                          |
| <b>Mn<sup>4+</sup>/ Mn %</b> | 63.27                      | 62.97                      | 66.48                      |
| <b>O/Mn</b>                  | 3.08                       | 2.18                       | 2.76                       |
